# Supplementary material for: Kinetically controlled catalytic synthesis of highly dispersed metal-in-carbon composite and its electrochemical behavior
Source: Royal Society of Chemistry journal article supplement (doi:10.1039/b914554k), 2009-01-01
Supplement: b914554k.pdf [file b914554k.pdf]

## Supplementary Information

### Kinetically Controlled Catalytic Synthesis of Highly Dispersed Metal-in-Carbon Composite and Its Electrochemical Behavior

Hong-Li Zhang<sup>a</sup>, Daniel E. Morse<sup>a,b\*</sup>

<sup>a</sup>*Institute for Collaborative Biotechnologies, California NanoSystems Institute and the Materials  
Research Laboratory, University of California, Santa Barbara, CA 93106, USA*

<sup>b</sup>*Department of Molecular, Cellular, and Developmental Biology, University of California, Santa  
Barbara, CA 93106, USA*

E-mail: [d\\_morse@lifesci.ucsb.edu](mailto:d_morse@lifesci.ucsb.edu)

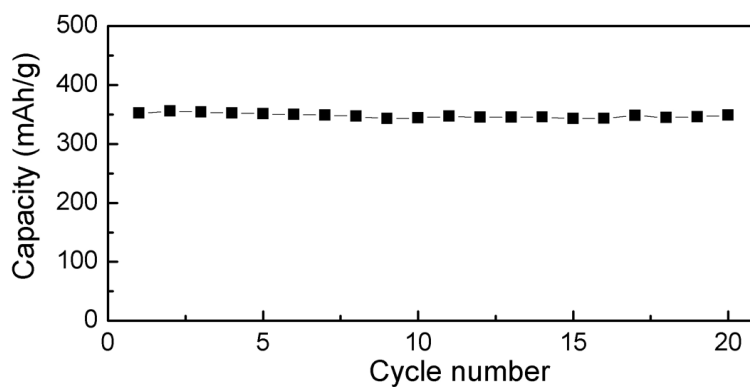

**Fig. S1** Electrochemical cyclic performance of the Sn@NG composite with ~5 wt.% Sn. The composite exhibits a reversible capacity of ~350 mAh/g with stable cyclability.

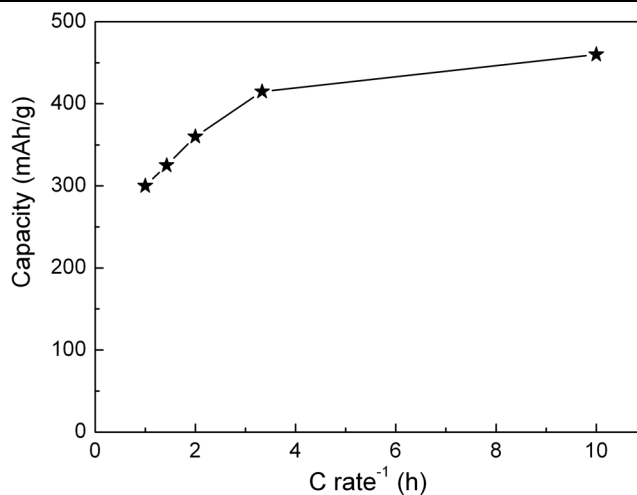

**Fig. S2** Rate capability of the Sn@NG composite with ~15 wt.% Sn. The composite exhibits a reversible capacity of ~450 mAh/g at 0.1 C-rate (i.e. 10 h discharge time), ~410 mAh/g at 0.3 C-rate, ~360 mAh/g at 0.5 C-rate, ~325 mAh/g at 0.7 C-rate, and ~300 mAh/g at 1 C-rate.

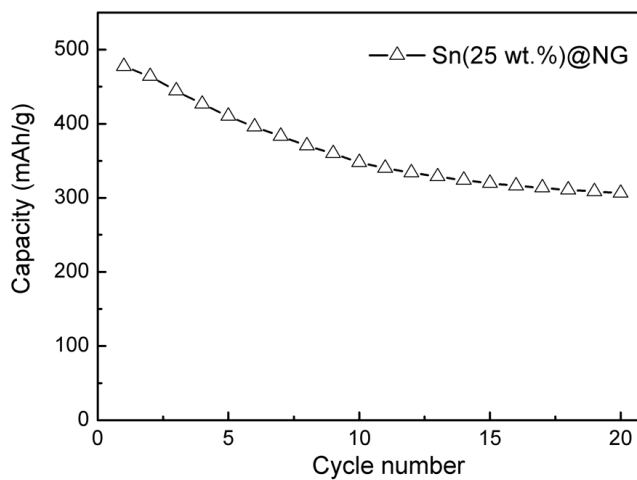

**Fig. S3** Electrochemical cyclic performance of the Sn@NG composite with Sn content of ~25 wt.%.

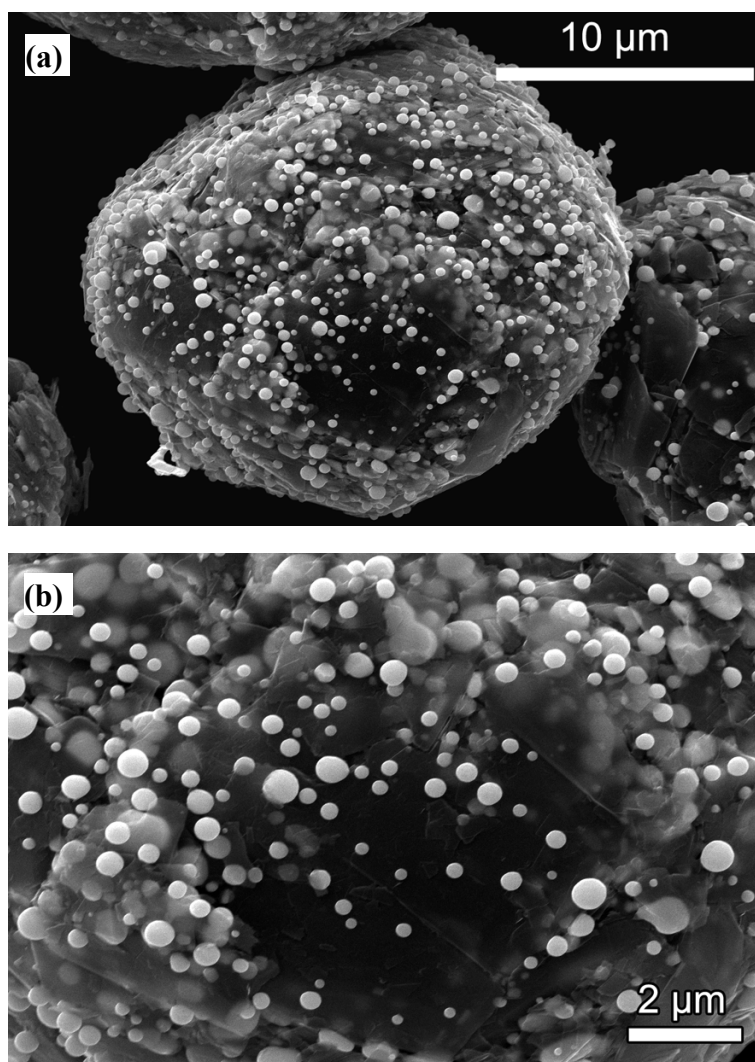

**Fig. S4** (a) and (b) SEM images of the Sn@NG composite with Sn content of ~25 wt.%, showing a large proportion of Sn nanoparticles on the surface of the NG spheres.

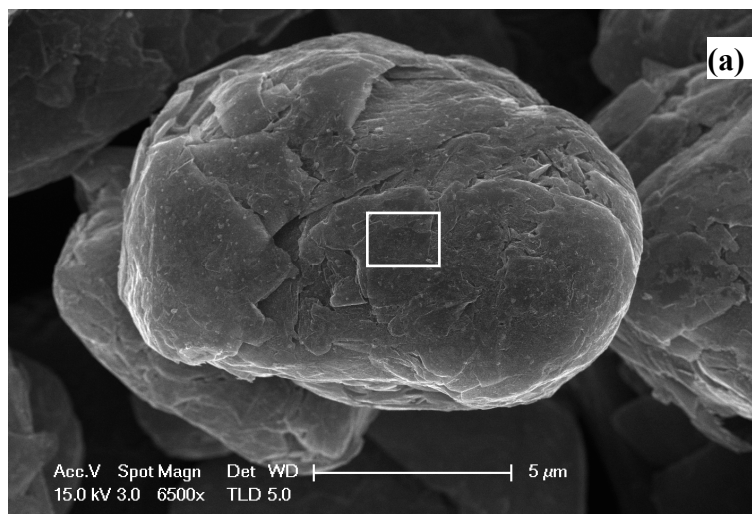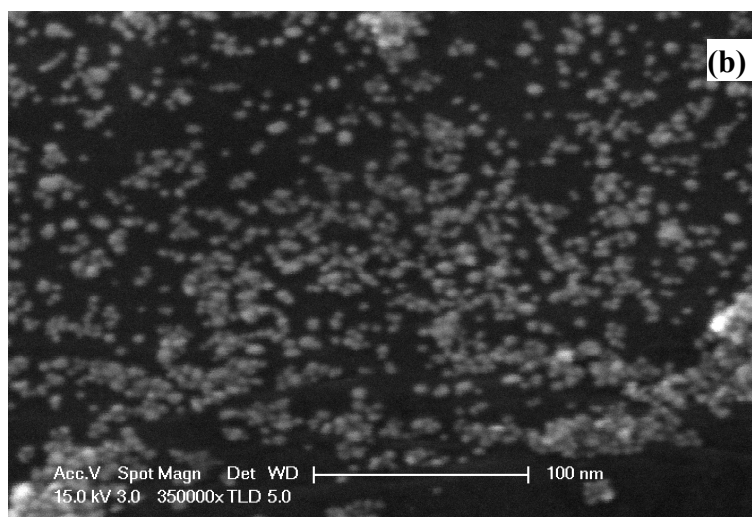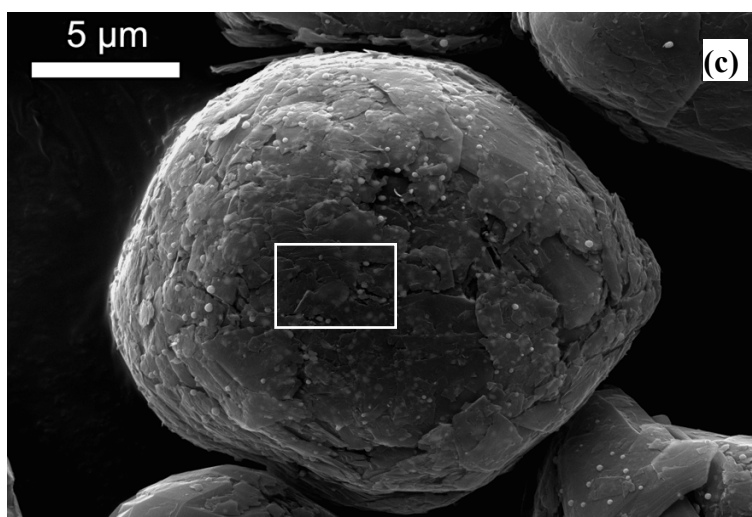

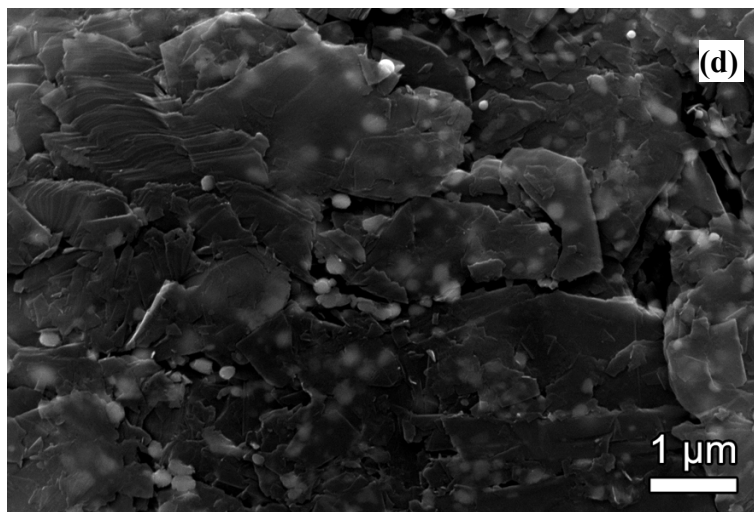

**Fig. S5** SEM images under different magnifications showing the feasibility of further reducing the size of the Sn particles ( $< 200$  nm) by tuning of the reaction kinetics. (a) and (b) the intermediate products before performing carbothermal reduction, showing that the size of the Sn oxide nanoparticles is ca. 10 nm by elaborately adjusting reaction kinetics in the vapor-diffusion catalysis; (c) and (d) the final Sn@NG composite after carbothermal reduction at 950 °C, showing that the size of the Sn particles in this composite is less than 200 nm in diameter. Moreover, the investigation on changing the conditions of carbothermal reduction (e.g. temperature and time) to reduce the coalescence and grain growth of the final Sn particles is also underway.
